# Supplementary material for: Mitofusin-2 modulates the epithelial to mesenchymal transition in thyroid cancer progression
Source: Springer Nature journal article supplement (doi:10.1038/s41598-021-81469-0), 2021-01-21

# **Mitofusin-2 modulates the epithelial to mesenchymal transition in thyroid cancer progression**

Mi-Hyeon You<sup>1</sup>, Min Ji Jeon<sup>1</sup>, Seong ryeong Kim<sup>2</sup>, Woo Kyung Lee<sup>3</sup>, Sheue-yann Cheng<sup>3</sup>, Goo Jang<sup>2</sup>, Tae Yong Kim<sup>1</sup>, Won Bae Kim<sup>1</sup>, Young Kee Shong<sup>1</sup>, Won Gu Kim<sup>1</sup>

<sup>1</sup>Department of Internal Medicine, Asan Medical Center, University of Ulsan College of Medicine, Seoul, Korea

<sup>2</sup>College of Veterinary Medicine, Seoul National University

<sup>3</sup>Laboratory of Molecular Biology, Center for Cancer Research, National Cancer Institute, National Institutes of Health, Bethesda, Maryland 20892-4264, USA

**Running title:** Mitofusin-2 deficiency elicits EMT in thyroid cancer

**Keywords:** Mitofusin-2, papillary thyroid cancer, EMT (epithelial to mesenchymal transition), tumor suppressor, Ras mutation

**Funding:** This study was supported by a National Research Foundation of Korea Research Grant (NRF-2017R1D1A1B0303248 and NRF-2018R1D1A1A02085365).

Mi-Hyeon You: mhyou80@gmail.com

Min Ji Jeon: mj080332@gmail.com

Seong ryeong Kim: sungryung92@naver.com

Woo Kyung Lee: woogyung.lee@nih.gov

Sheue-yann cheng: chengs@mail.nih.gov

Goo Jang: snujang@snu.ac.kr

Tae Yong Kim: tykim@amd.seoul.kr

Won Bae Kim: kimwb@amc.seoul.kr

Young Kee Shong: ykshong@amc.seoul.kr

Won Gu Kim: wongukim@amc.seoul.kr

**Corresponding author and person to whom reprint requests should be addressed**

**Won Gu Kim, M.D., Ph.D.**

Department of Internal Medicine, Asan Medical Center, University of Ulsan College of Medicine

88, Olympic-ro 43-gil, Songpa-gu, Seoul 05505, Korea

Phone: +82-2-3010-5883; Fax: +82-2-3010-6962; E-mail: wongukim@amc.seoul.kr

**Disclosure statement:** The authors have nothing to disclose

## Supplementary Figure 1

MFN2 expression is a prognostic marker in human thyroid cancer.

(A-i) Relationship of *MFN2* expression with TDS. Correlation analysis using Pearson correlation coefficient and (A-ii) comparison of *MFN2* expression between high and low TDS tumors.

(B-i) Relationship of *MFN2* expression with BRS. Correlation analysis using Pearson correlation coefficient and (B-ii) comparison of *MFN2* expression between high and low BRS tumors.

(C) Comparison of *MFN2* expression between tumors without and with LNM. Data represent the mean  $\pm$  SD. Asterisks ( $P < 0.001$  [\*\*\*],  $P < 0.0001$  [\*\*\*\*]) indicate significant differences from the statistical analyses. Abbreviations: TDS, thyroid differentiation scores; BRS, BRAFV600E-RAS scores; LNM, lymph node metastasis.

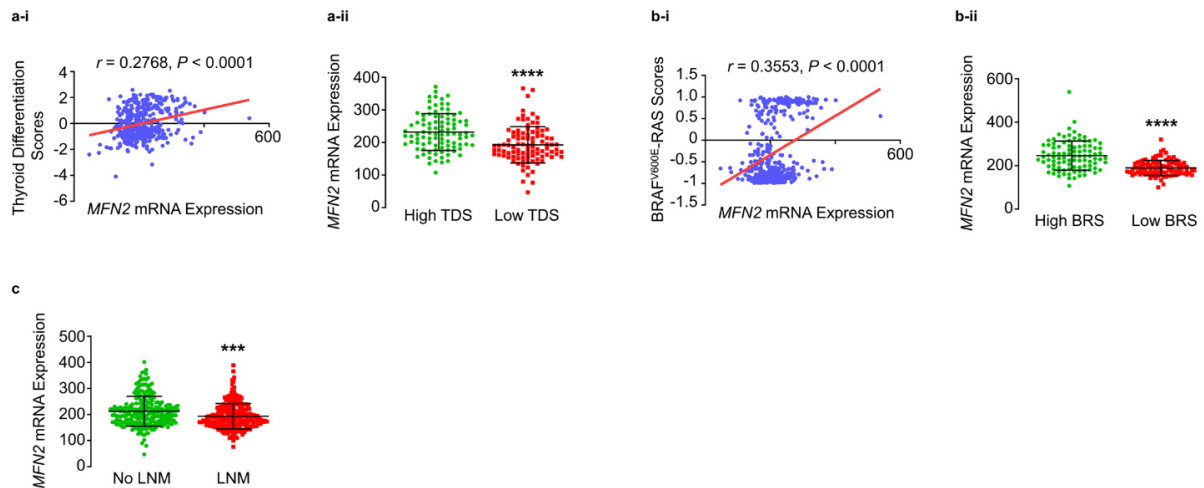

## Supplementary Figure 2

(A) Knockout of MFN2 in the Cal 62 cell line. (A-i) Information on two guide RNAs on exon 4 and exon 5. Mutation assay with the T7E1 enzyme on exon 4 (A-ii) and exon 5 (A-iii); M: marker DNA ladder, (1): negative control, 1: wild-type genome, 2: transfected cells, (+): positive control. (A-iv) MFN2 knockout in the Cal62 cell line confirmed by western blotting.

(B-i) Illustration of the MFN2 and GFP expression vector.

(B-ii) Representative GFP-positive colony (left: brightness, right: fluorescence).

(B-iii) MFN2 overexpression in the Cal62 and HTH83 cell lines confirmed by western blotting.

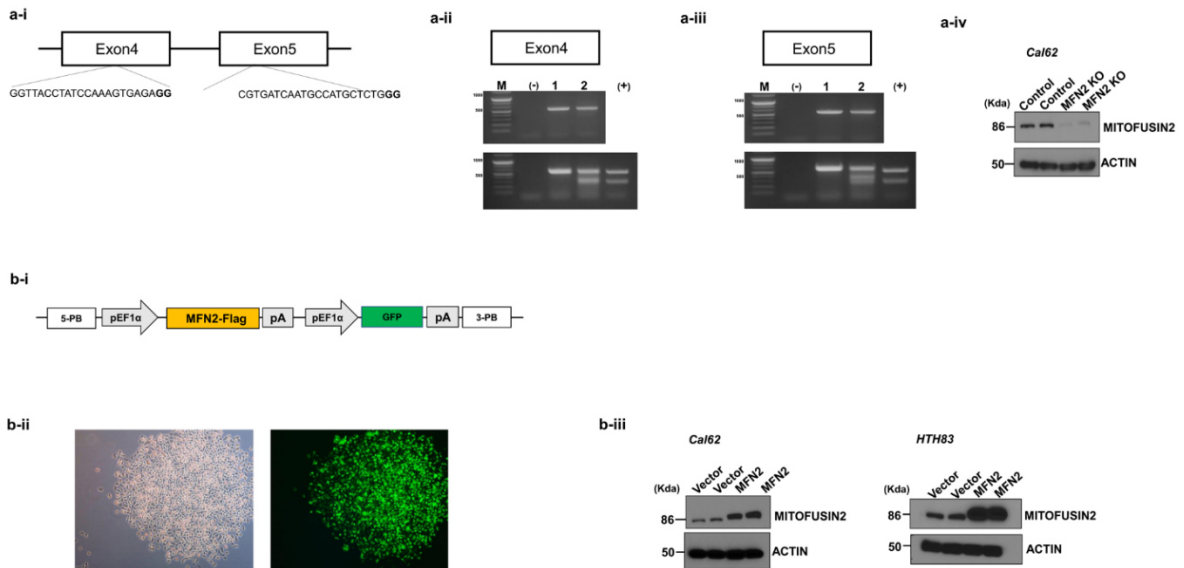

### Supplementary Figure 3

(A) Mitofusin-2 was not associated with the proliferation ability in Cal62 cells.

(A-i) Assay for comparing the proliferation ability of *MFN2* KO and control Cal62 cells (n.s; not significant).

(A-ii) Assay for comparing colony formation between *MFN2* KO and control Cal62 cells on day 7. (A-iii) Quantification of the colony forming assay (n.s; no significant difference).

(A-iv) Assay for comparing the proliferation ability of Cal62 Vector and *MFN2* groups.

(A-v) Image representing the colony formation by the Cal62 Vector and *MFN2* groups on day 7. (A-vi) Quantification of (A-v).

(B) Mitofusin-2 was also not associated with cell proliferation ability in HTH83 cells.

(B-i) Assay for comparing the proliferation ability of HTH83 *MFN2*-SiVector and SiMFN2 groups (n.s; not significant).

(B-ii) Image representing colony formation by the HTH83 *MFN2*-SiVector and SiMFN2 groups. (B-iii) Quantification of (B-ii) (n.s; no significant difference).

(B-iv) Assay for comparing the proliferation ability of the HTH83 Vector and *MFN2* groups. (B-v) Image representing colony formation by the HTH83 Vector and *MFN2* groups.

(B-vi) Quantification of (B-v) (n.s; no significant difference). Asterisks ( $P < 0.01$  [\*\*]) indicate significant differences from the statistical analyses. Each data point represents the mean  $\pm$  standard error of three independent experiments.

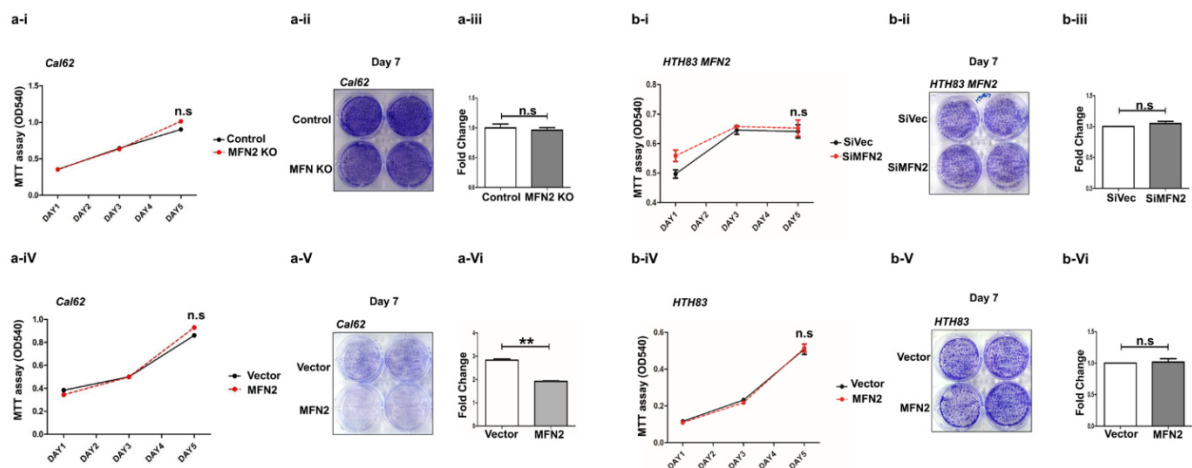

## Supplementary Figure 4

(A) Mitofusin-2 was associated with proliferation ability of MEF cells. Assay for comparing the proliferation ability of the *MFN2* KO and MEF WT cells.

(B-i) Colony forming assay of *MFN2* KO and WT MEF cells on day 7.

(B-ii) Quantification of the colony forming assay. Asterisks ( $P < 0.05$  [\*],  $P < 0.01$  [\*\*],  $P < 0.001$  [\*\*\*]) indicate significant differences from the statistical analyses. Each data point represents the mean  $\pm$  standard error of three independent experiments.

**a**

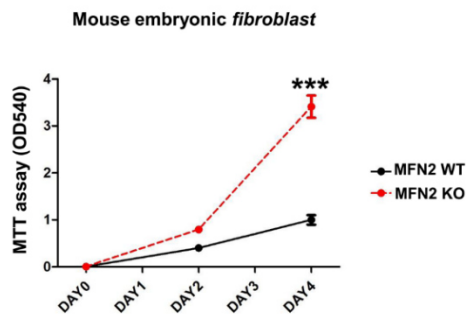

**b-i**

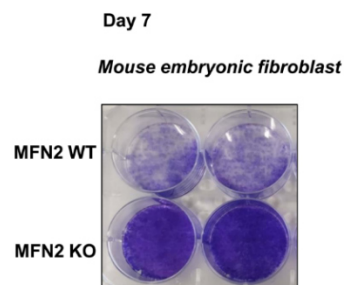

**b-ii**

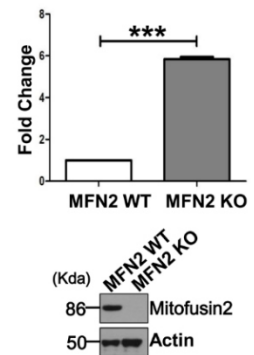

## Supplementary Figure 5

(A-i) Transwell assays were performed in the HTH83 Vector and *MFN2* overexpression groups. A representative image was taken 12 h after the initial seeding (pore size 0.8  $\mu\text{m}$ ). (A-ii) Graph of the quantified results of (A-i).

(B-i) Wound-healing assays were performed to investigate the differences between the HTH83 Vector and HTH83 *MFN2* OE groups. We measured the gap distance 9 h after the initial scratching.

(B-ii) Graph of the quantified results of (B-i). Asterisks ( $P < 0.05$  [\*],  $P < 0.01$  [\*\*],  $P < 0.001$  [\*\*\*]) indicate significant differences from the statistical analyses. Each data point represents the mean

$\pm$  standard error of three independent experiments.

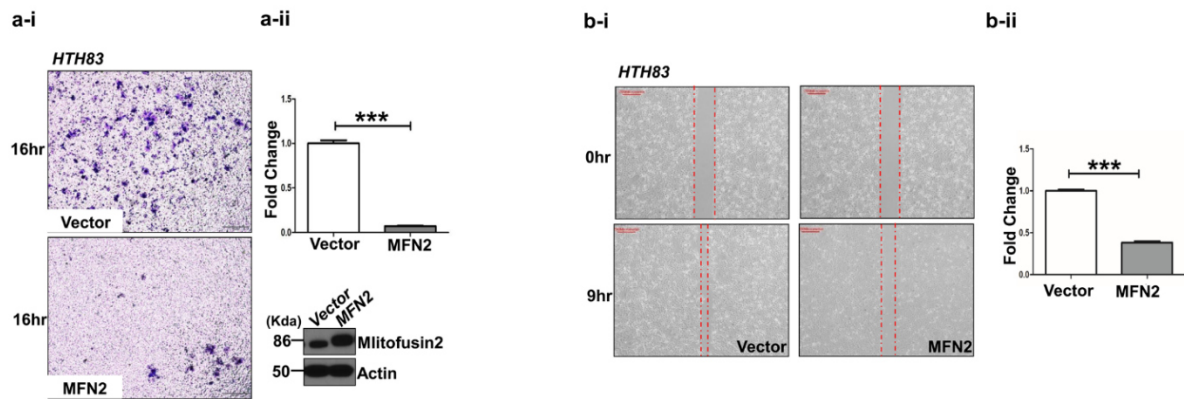

## Supplementary Figure 6

(A-i) Transwell assays were performed in *MFN2* WT and KO MEF cells. A representative image was taken 24 h after the initial seeding (pore size 0.8  $\mu\text{m}$ ). (A-ii) Graph of the quantified results of (A-i). Significantly more cells migrated from *MFN2* KO MEFs than from the *MFN2* WT MEFs.

(B-i) Wound-healing assays were performed to investigate the differences between *MFN2* WT and KO MEFs. We measured the gap distance 16 h after the initial scratching. (B-ii) Quantification of (B-i) compared to the initial scratch size of the first gap distance after 16 h. Asterisks ( $P < 0.05$  [\*],  $P < 0.01$  [\*\*],  $P < 0.001$  [\*\*\*]) indicate significant differences from the statistical analyses. Each data point represents the mean  $\pm$  standard error of three independent experiments.

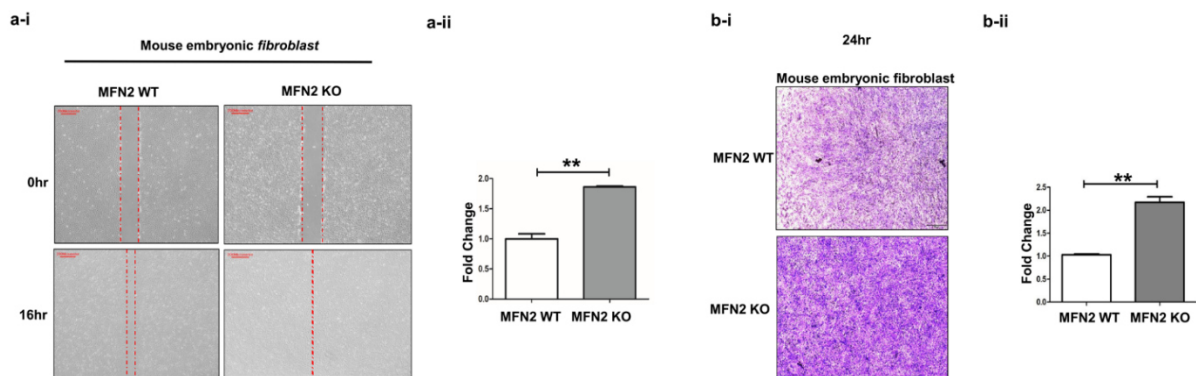

## Supplementary Figure 7

MFN2 overexpression leads to pERK signal suppression.

(A) Immunoblotting of MFN2, *p-p90* RSK (Ser380), *p*AKT (Ser473), and *p*-S6 (Ser235/236)

was conducted using lysates from Cal62 C and Cal62 MFN2 OE cells.

(B) Quantification of (B-i) MFN, (B-ii) *p-p90* RSK (Ser380), (B-iii) *p*-AKT (Ser473), and (B-iv) *p*-S6 (Ser235/236) levels.

(C) Immunoblotting for investigating the levels MFN2, *p-p90* RSK (Ser380), *p*AKT (Ser473), and *p*-S6 (Ser235/236) was performed using cell lysates from the HTH83 Vector and HTH83 MFN2 overexpression groups.

(D) Quantification of (D-i) *MFN2*, (D-ii) *p-p90* RSK (Ser380), (D-iii) *p*-AKT (Ser473), and (D-iv) *p*-S6 (Ser235/236). Asterisks ( $P < 0.05$  [\*],  $P < 0.01$  [\*\*],  $P < 0.001$  [\*\*\*]) indicate significant differences from the statistical analyses. Each data point represents the mean  $\pm$  standard error of three independent experiments.

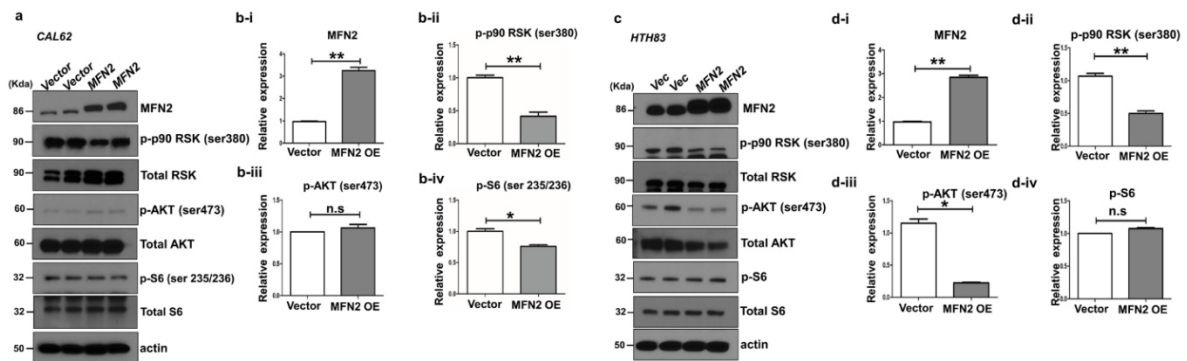

## Supplementary Table 1. Real-time q-RT-PCR primer sequences

Supplementary Table 1. Primers used for mRNA expression analysis

| Gene       | Primer  | 5'→3' sequence          |
|------------|---------|-------------------------|
| E-Cadherin | Forward | GAACGCATTGCCACATACAC    |
|            | Reverse | GAATTCGGGCTTGTGTCAT     |
| N-Cadherin | Forward | CCTGAGGGATCAAAGCCTGGAAC |
|            | Reverse | TTGGAGCCTGAGACACGATTCTG |
| Snail      | Forward | CTCCAGCAGCCCTACGAC      |
|            | Reverse | CGGTGGGGTTGAGGATCT      |

**Uncropped Gels shown as representative blots in Main& Supplementary Figures**

**Figure 2**

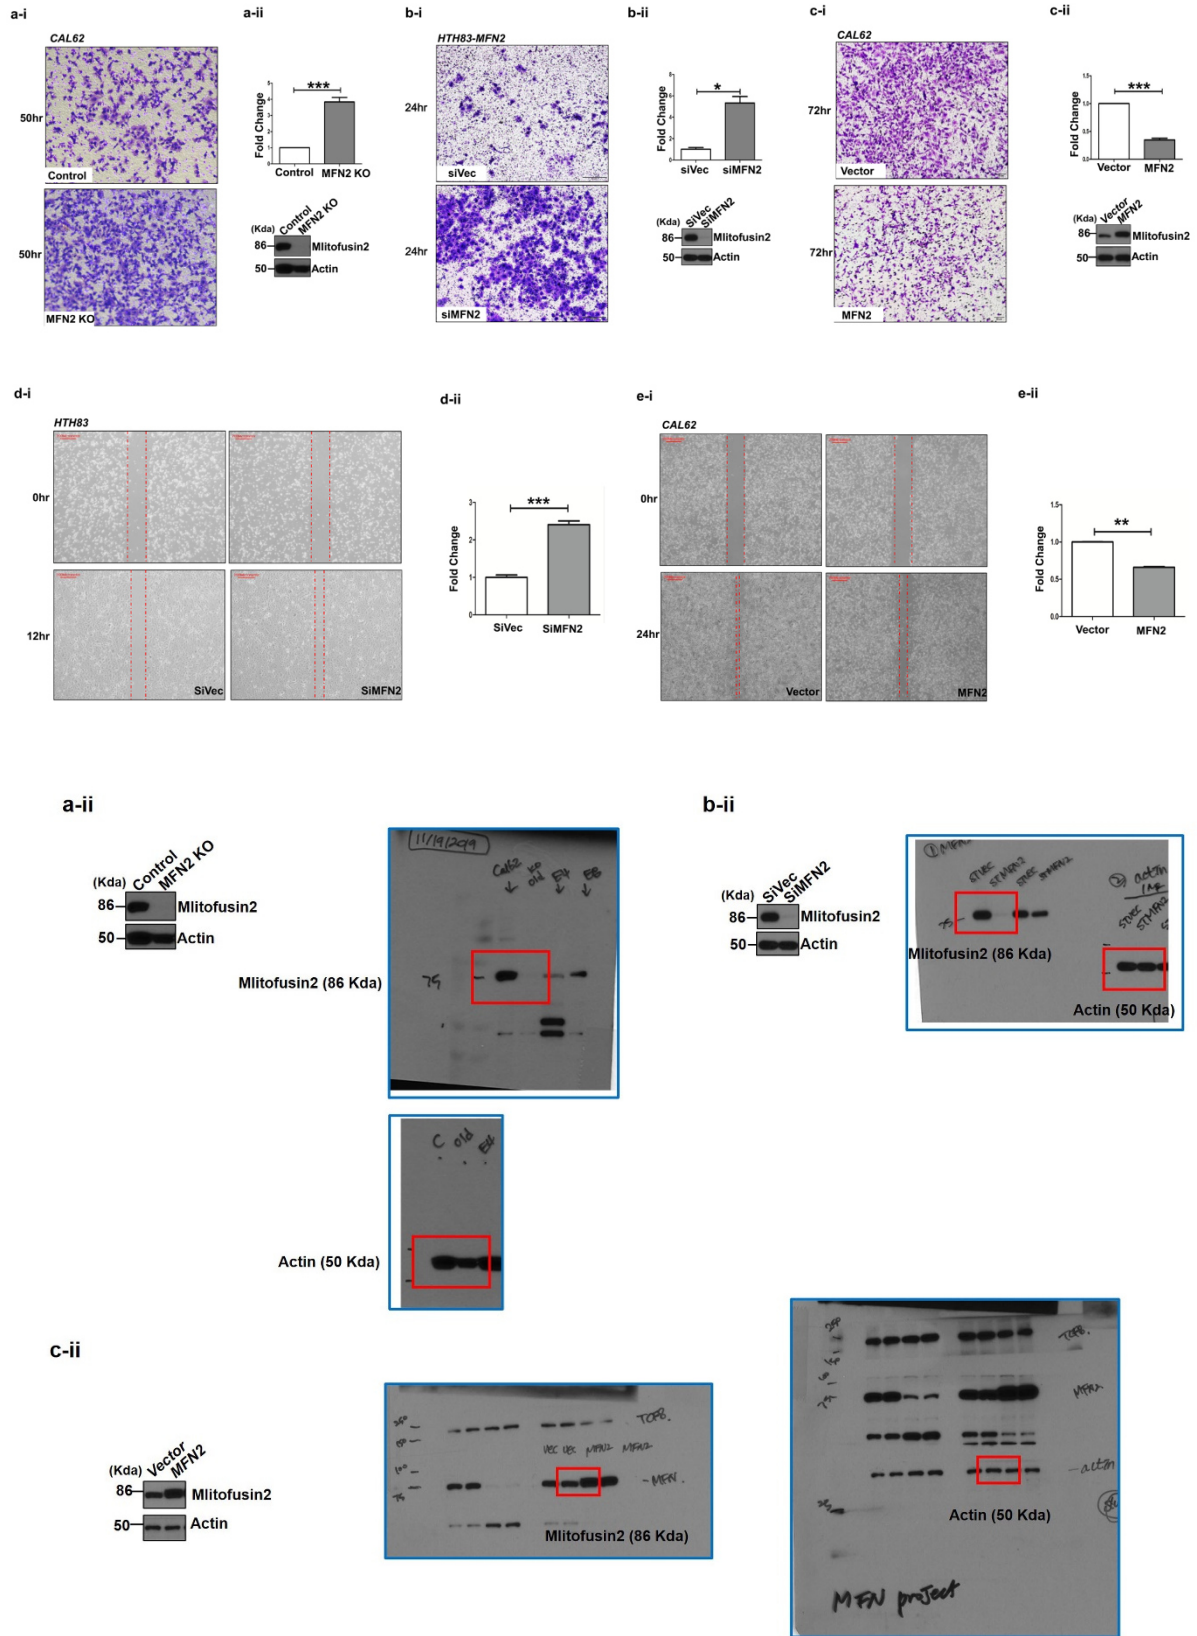

**Figure 3**

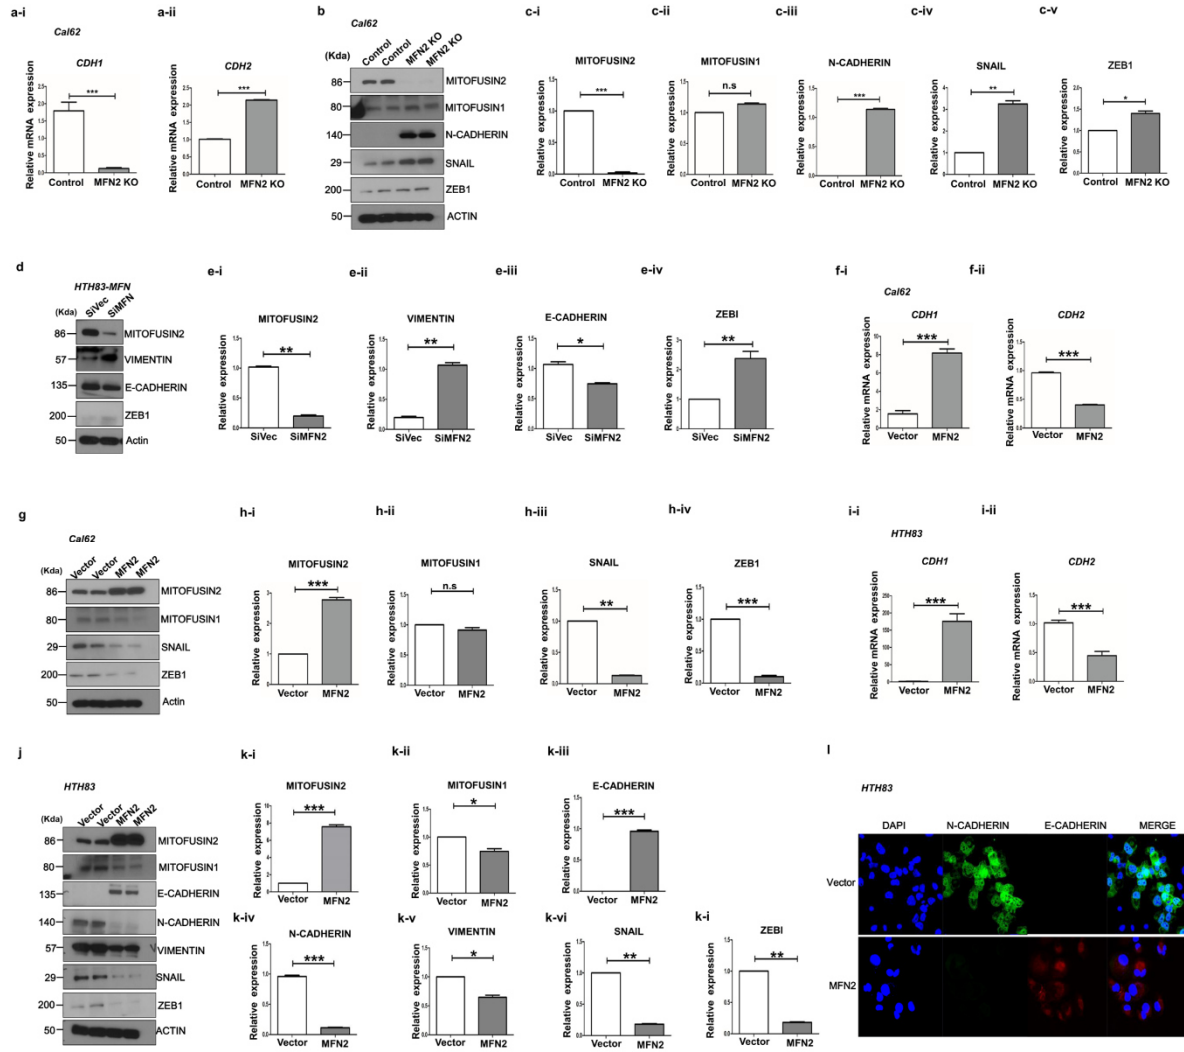

b

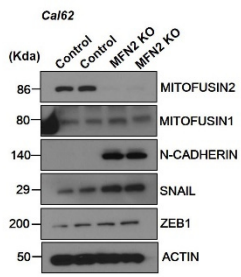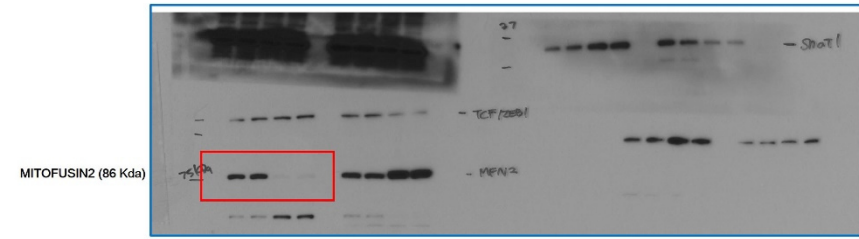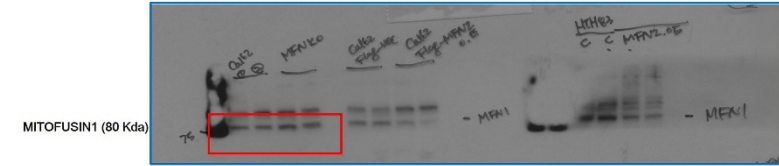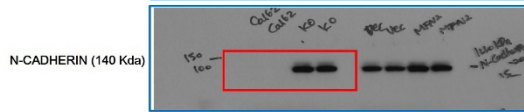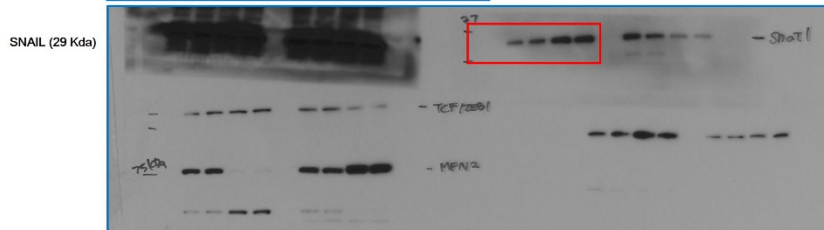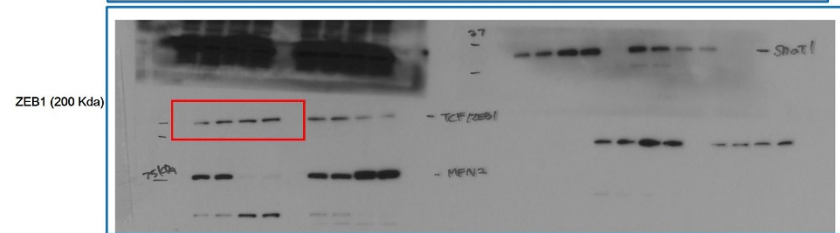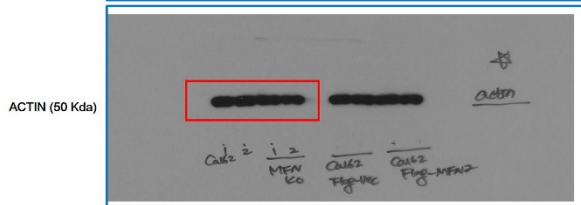

d

HTH83-MFN  
(Kda) SVEC SW620  
86 - MITOFUSIN2  
57 - VIMENTIN  
135 - E-CADHERIN  
200 - ZEB1  
50 - Actin

MITOFUSIN2 (86 Kda)

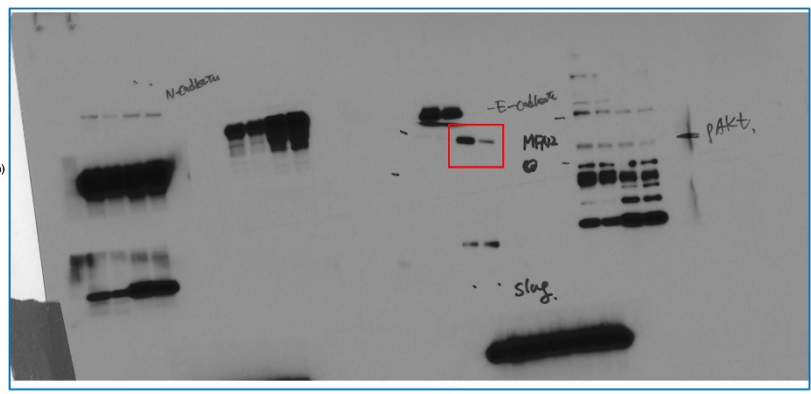

VIMENTIN (57 Kda)

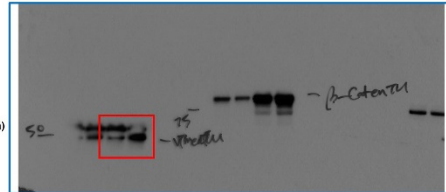

E-CADHERIN (135 Kda)

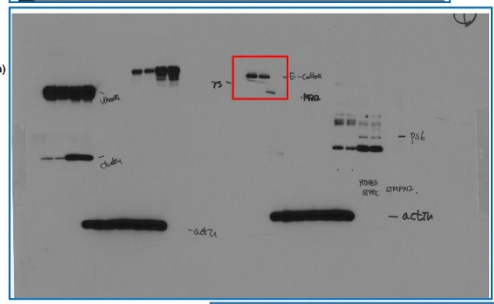

ZEB1 (200 Kda)

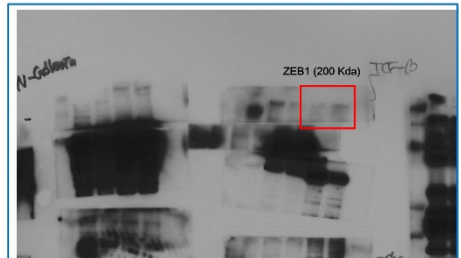

Actin (50 Kda)

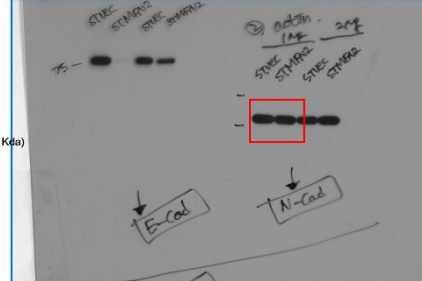

g

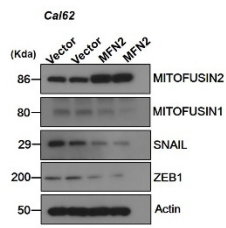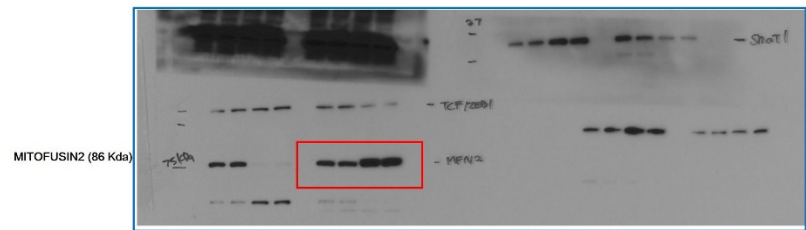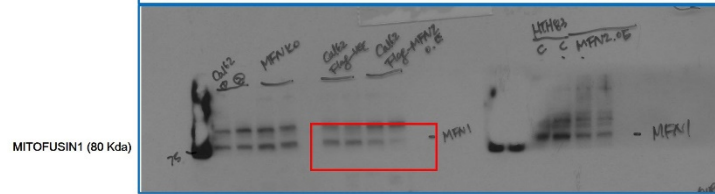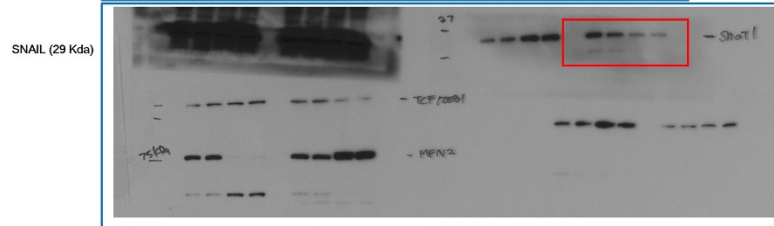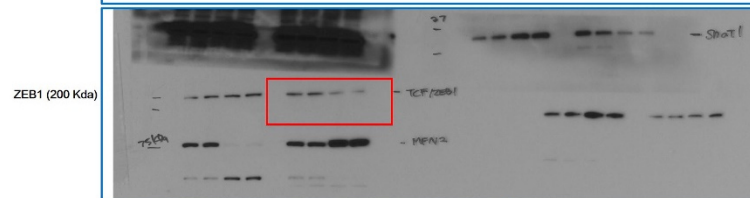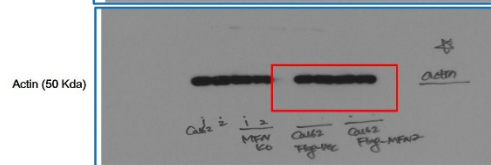

j

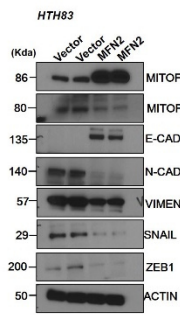

MITOFUSIN2 (86 Kda)

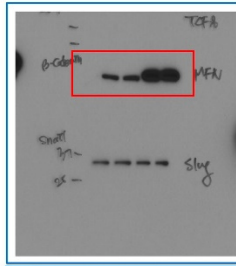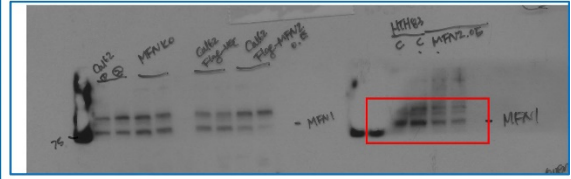

MITOFUSIN1 (80 Kda)

N-CADHERIN (140 Kda)

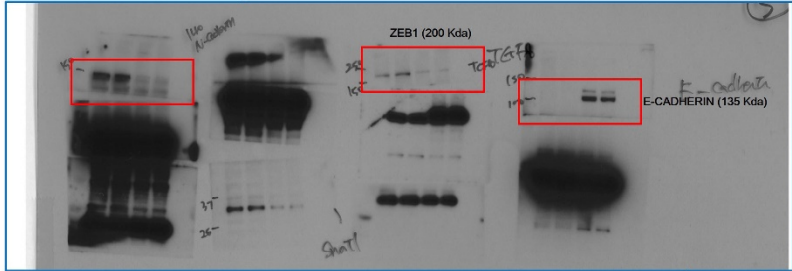

VIMENTIN (57 Kda)

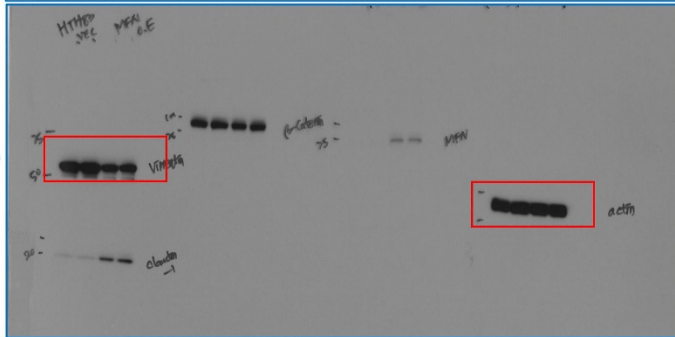

ACTIN (50 Kda)

SNAIL (29 Kda)

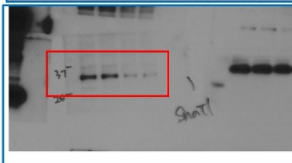

**Figure 4**

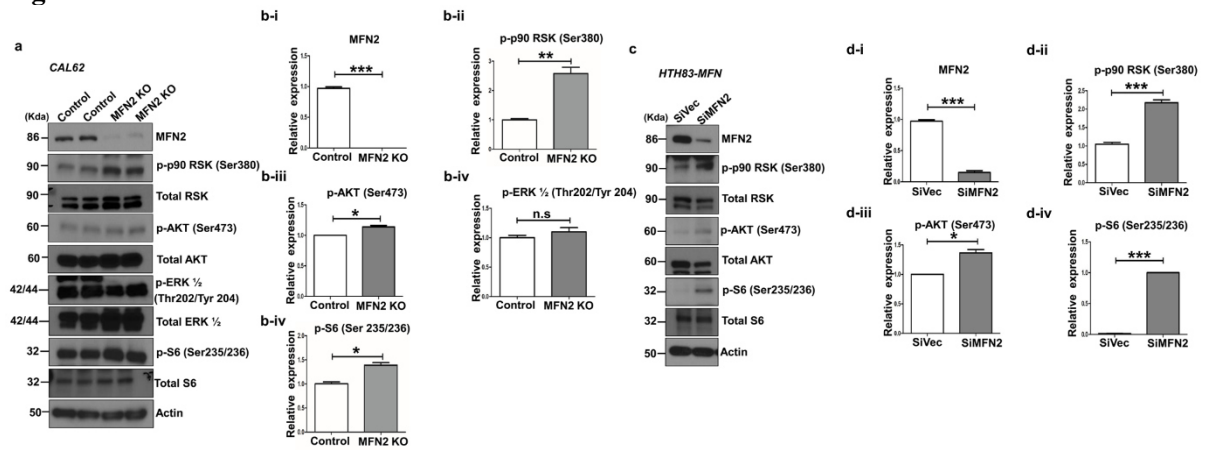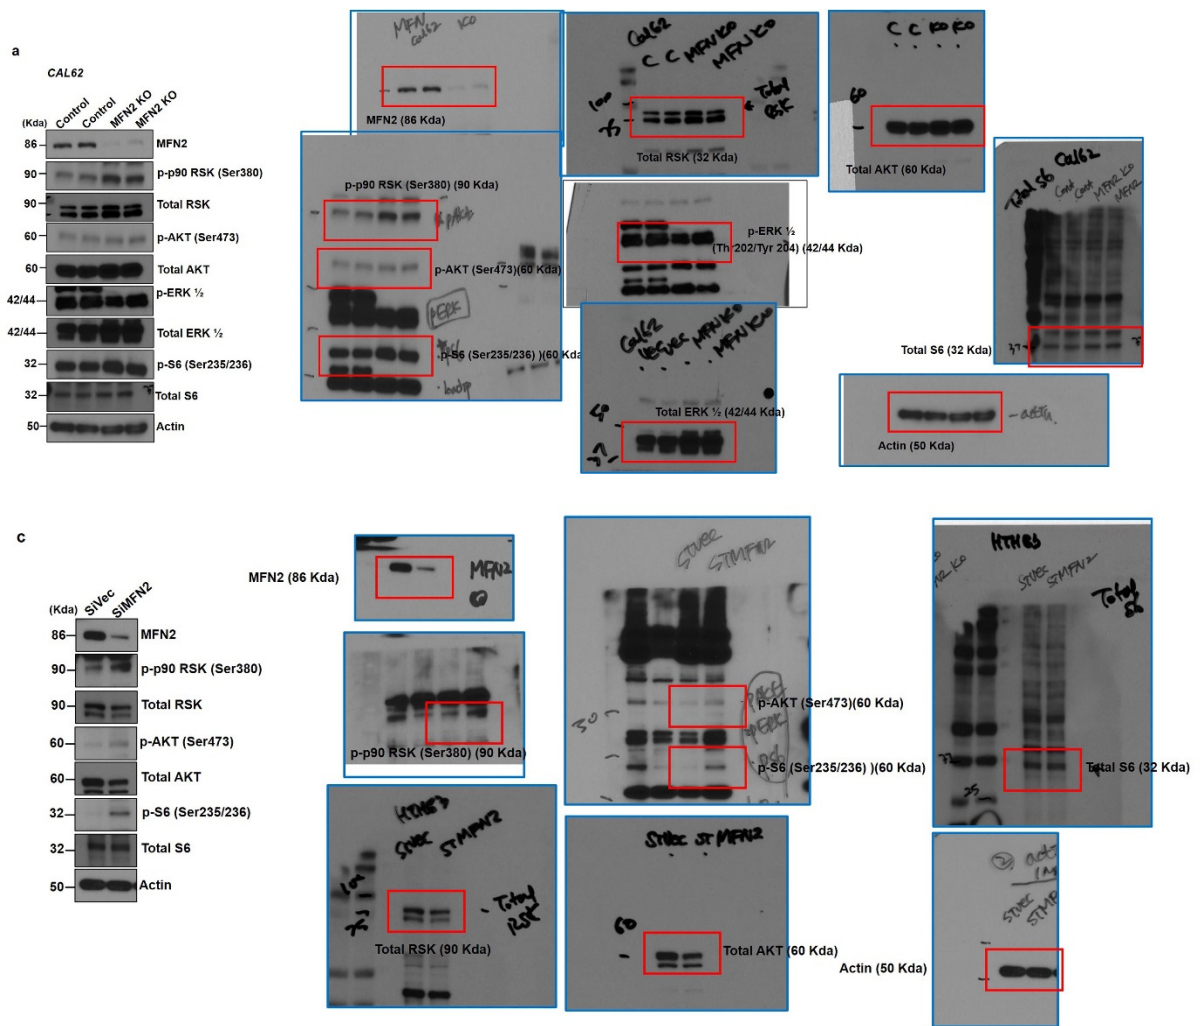

**Figure 5**

**a-i**

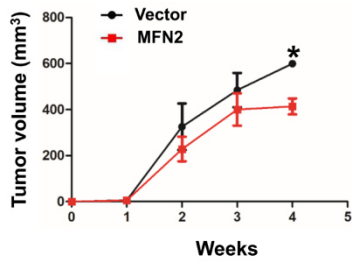

**a-ii**

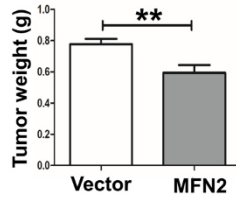

**b**

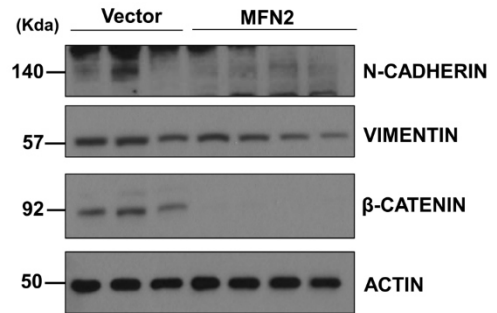

**c-i**

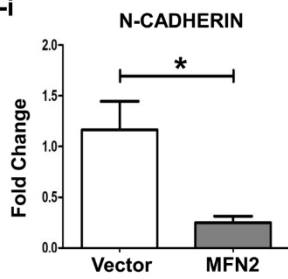

**c-ii**

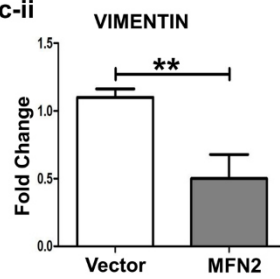

**c-iii**

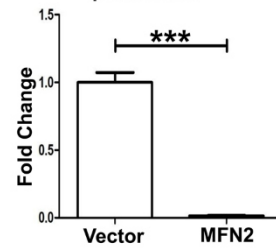

**b**

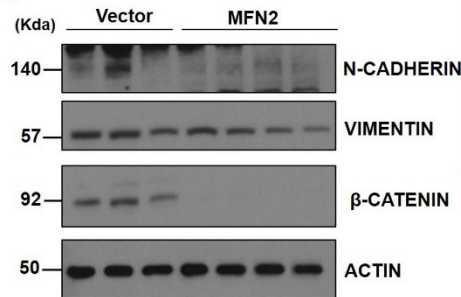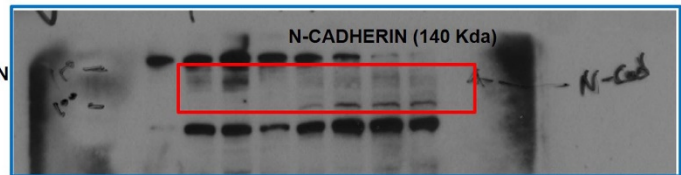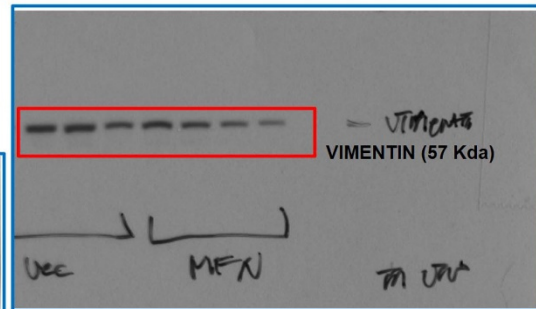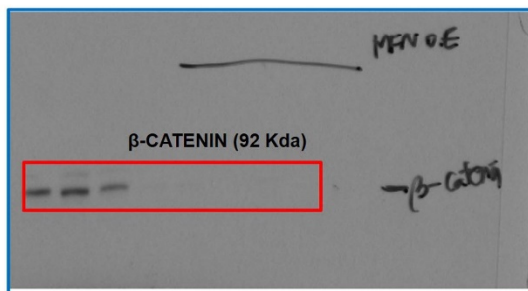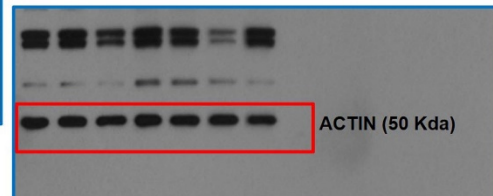

# Supplementary Figure 2

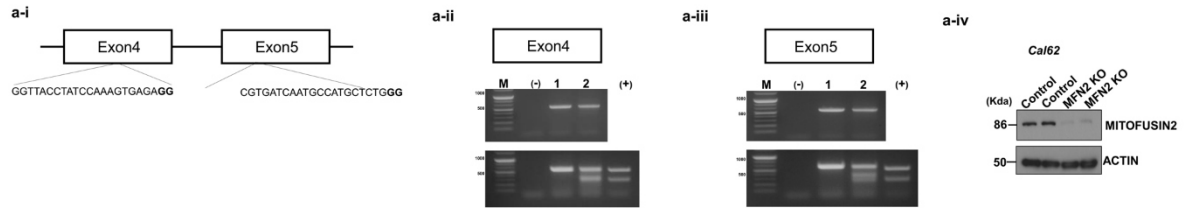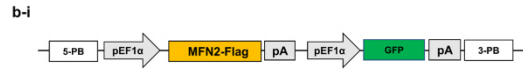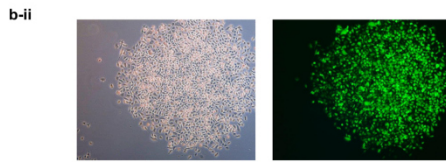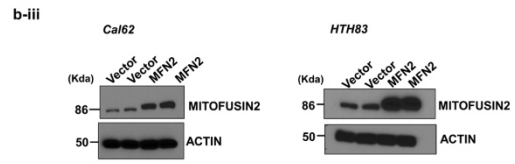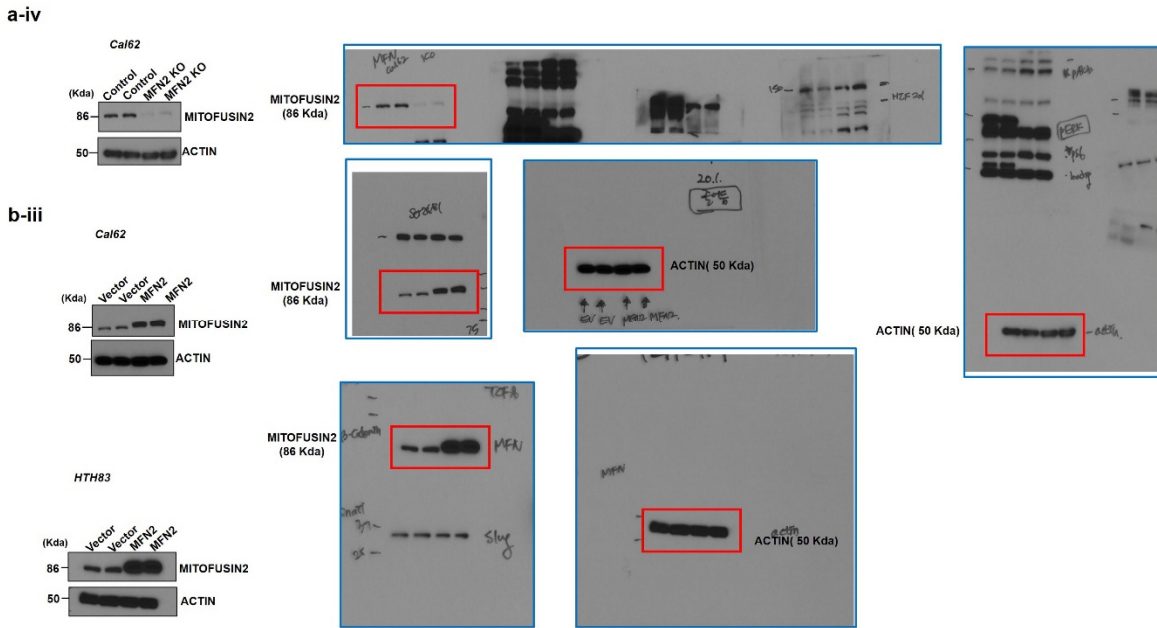

# Supplementary Figure 4

a

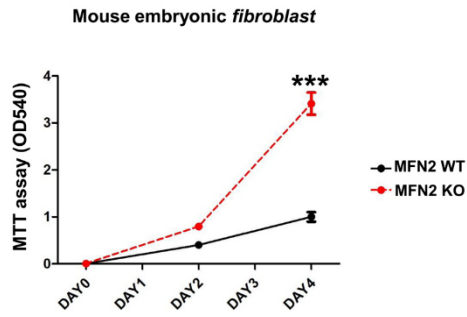

b-i

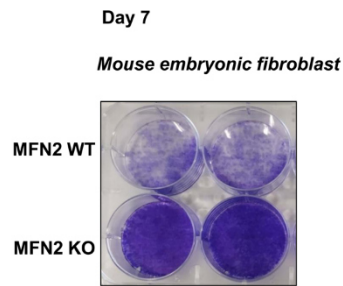

b-ii

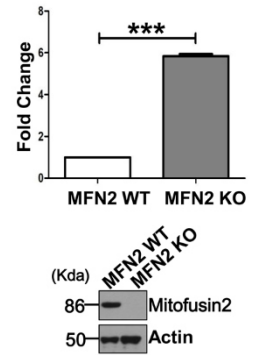

b-ii

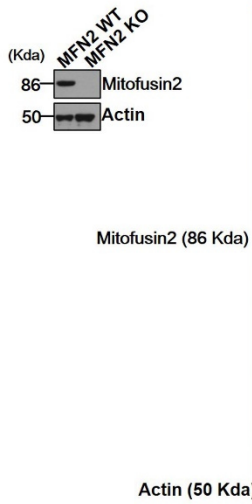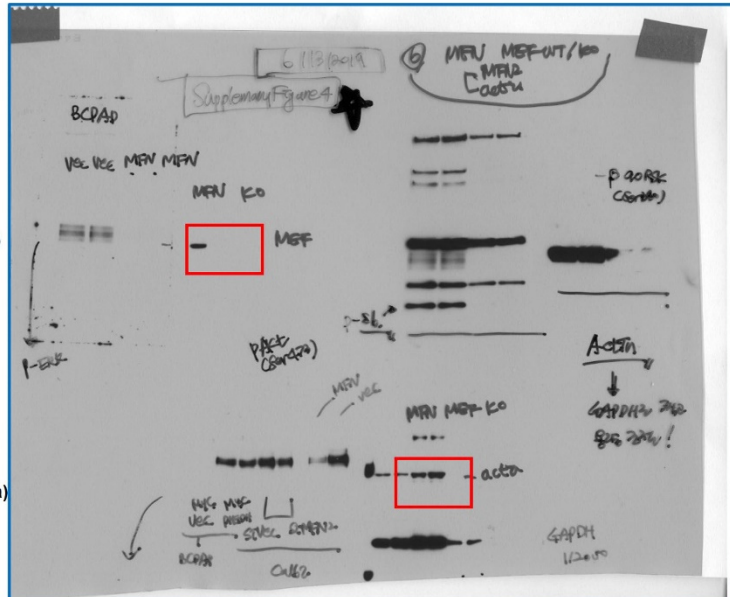

# Supplementary Figure 5

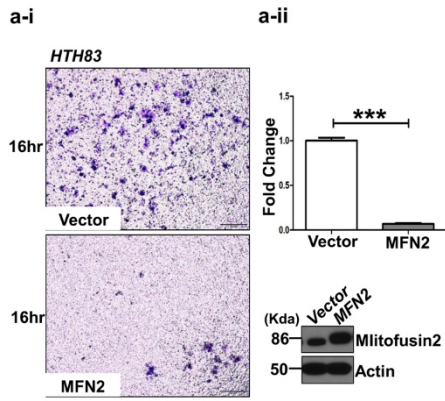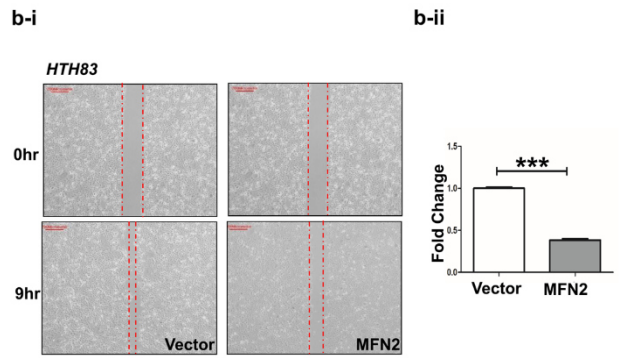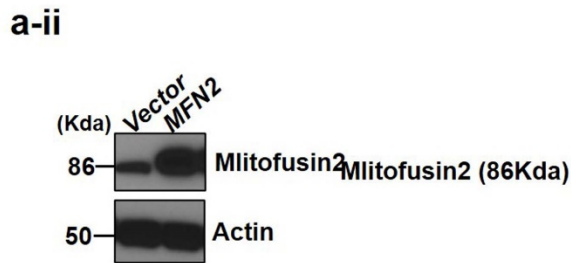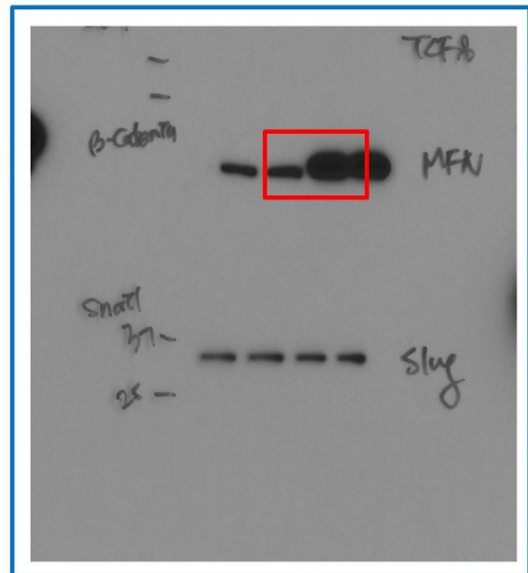

Actin (50 Kda)

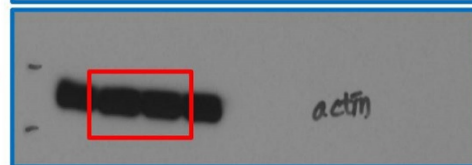

# Supplementary Figure 7

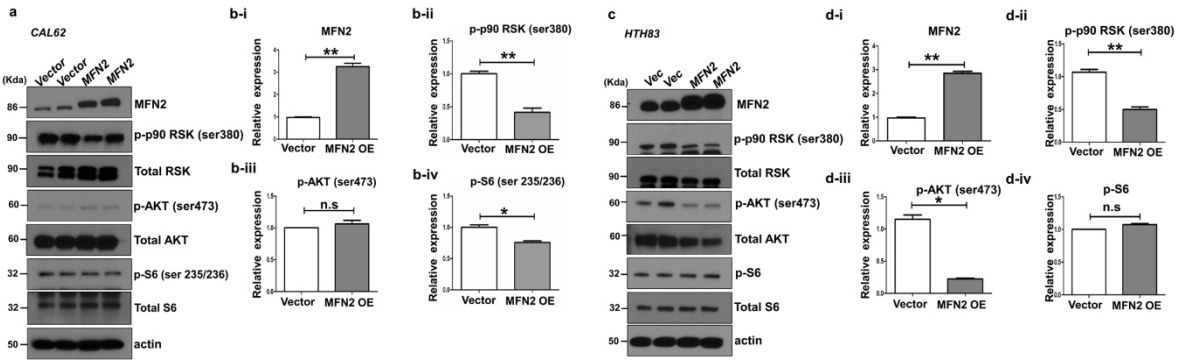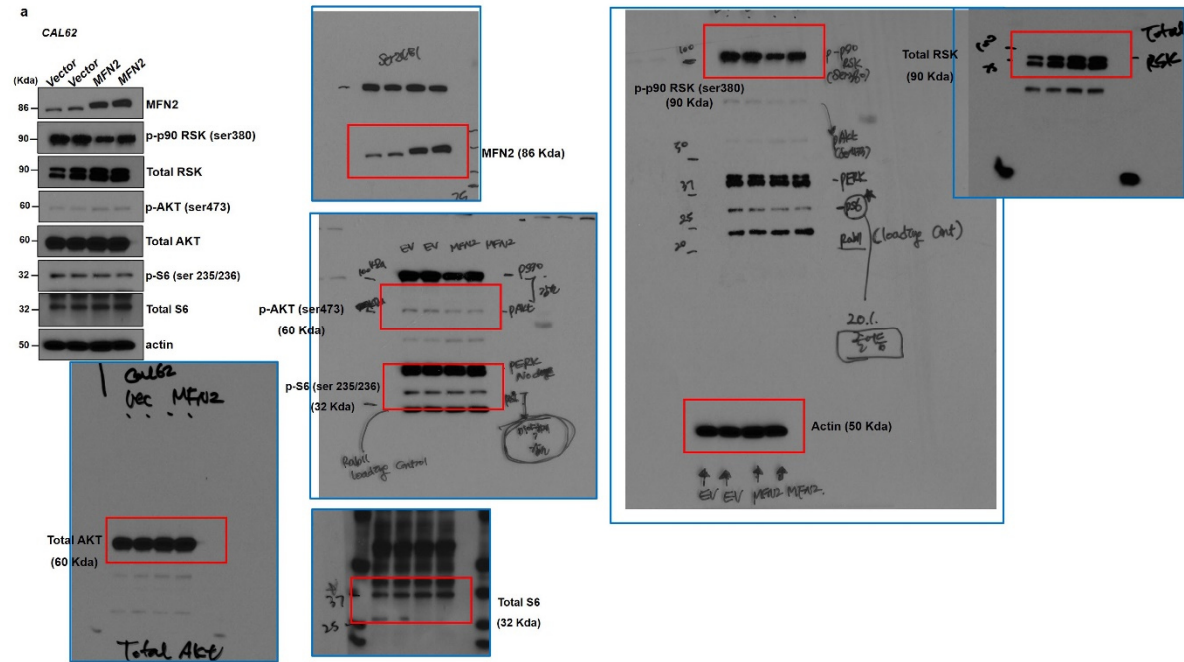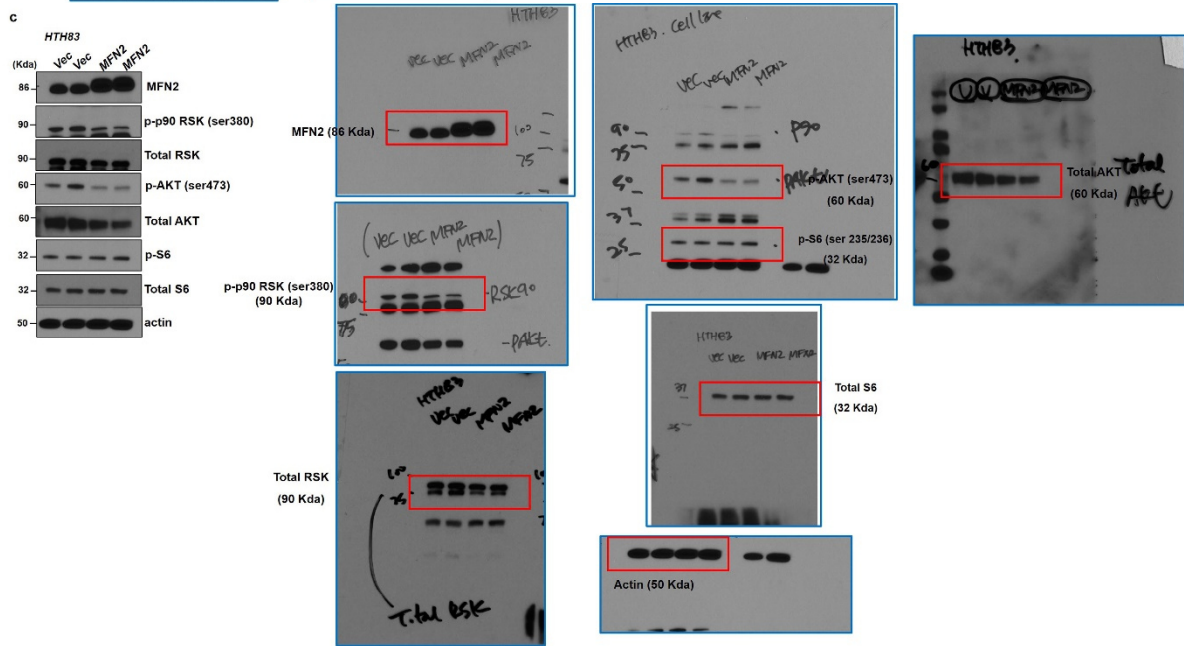

Supplement: MOESM1 [file 41598_2021_81469_MOESM1_ESM-1.pdf]
